# Supplementary material
Source: PubMed Central journal article supplement (PMC4254628)
Supplement: NIHMS633791-supplement-01.pdf [file NIHMS633791-supplement-01.pdf]

1 **Table E1. Major and minor criteria as well as frequent wheezing definitions for the original API,**  
 2 **modified API and University of Cincinnati API (ucAPI).**

|                                                 | <b>Original API</b> <sup>4</sup>          | <b>Modified API</b> <sup>8</sup>                     | <b>University of Cincinnati API</b>            |
|-------------------------------------------------|-------------------------------------------|------------------------------------------------------|------------------------------------------------|
| Frequent wheezing                               | Wheezing score $\geq 3$ on 5 point scale* | $\geq 4$ episodes in a year during the first 3 years | $\geq 2$ episodes per year in between ages 2-3 |
| Parental history of asthma                      | Major                                     | Major                                                | Major                                          |
| Physician diagnosed atopic dermatitis           | Major                                     | Major                                                | Major                                          |
| Allergic sensitization to $\geq 1$ aeroallergen | <b>Not used</b>                           | Major                                                | Major                                          |
| Allergic sensitization to foods                 | <b>Not used</b>                           | Minor (milk, egg or peanuts)                         | Minor (Milk or eggs)                           |
| Wheezing unrelated to colds                     | Minor                                     | Minor                                                | Minor                                          |
| Blood eosinophils                               | Minor                                     | Minor                                                | <b>Not used</b>                                |
| Physician diagnosed allergic rhinitis           | Minor                                     | Not used                                             | Minor                                          |

3  
 4 \*The original API defined parental report of “frequent wheezing” by a score  $\geq 3$  on a 1 to 5 scale Likert  
 5 ranging from “very rarely” to “on most days”.<sup>4</sup>

6  
 7  
 8 **Table E2. University of Cincinnati API (ucAPI) defined with  $\geq 4$  wheezing episodes per year:**  
 9 **Sensitivity, Specificity, Positive Predictive Value, and Negative Predictive Values for Asthma at age**  
 10 **7.**

| <b>Test*</b><br>(No. with asthma) | <b>Sensitivity</b><br>(%)<br>[95% CI] | <b>Specificity</b><br>(%)<br>[95% CI] | <b>Positive Predictive Value</b><br>(%)<br>[95% CI] | <b>Negative Predictive Value</b><br>(%)<br>[95% CI] | <b>Likelihood Ratio</b> |            |
|-----------------------------------|---------------------------------------|---------------------------------------|-----------------------------------------------------|-----------------------------------------------------|-------------------------|------------|
|                                   |                                       |                                       |                                                     |                                                     | <b>LR+</b>              | <b>LR-</b> |
| <b>ucAPI</b> <sup>#</sup> (30)    | 32.3<br>[22.9-42.8]                   | 95.9<br>[93.6-97.5]                   | 61.2<br>[46.2-74.8]                                 | 87.5<br>[84.3-90.3]                                 | 7.8                     | 0.7        |

12 \* At age 3; ucAPI: University of Cincinnati Asthma Predictive Index; # ucAPI defined using  $\geq 4$  episodes  
 13 of wheezing in the prior 12 months (instead of  $\geq 2$  wheezing episodes); LR+: positive likelihood ratio;  
 14 LR-: negative likelihood ratio.

15

16 **Table E3. Adjusted Odds Ratios for Associations of Positive ucAPI (using a criterion of  $\geq 4$**   
 17 **wheezing episodes per year)<sup>#</sup>, Persistent Wheezing, Atopic Persistent Wheezing and Non-atopic**  
 18 **Persistent Wheezing at Age 3 With Asthma Outcome at Age 7 in Separate Logistic Regression**  
 19 **Models.**

| Exposure/Covariate                                                | aOR (95% CI) for Asthma at 7 years<br>[p-value <sup>^</sup> ] |                            |                                  |                                      |
|-------------------------------------------------------------------|---------------------------------------------------------------|----------------------------|----------------------------------|--------------------------------------|
|                                                                   | ucAPI Model                                                   | Persistent Wheezing Model  | Atopic Persistent Wheezing Model | Non-atopic Persistent Wheezing Model |
| Positive ucAPI at 3 years                                         | 14.1 (6.93-28.57)<br><0.01                                    | -                          | -                                | -                                    |
| Persistent Wheezing at 3 years                                    | -                                                             | 9.81 (4.93-19.52)<br><0.01 | -                                | -                                    |
| Atopic Persistent Wheezing at 3 years                             | -                                                             | -                          | 10.35 (4.12-26.01)<br><0.01      | -                                    |
| Non-atopic Persistent Wheezing at 3 years                         | -                                                             | -                          | -                                | 5.36 (2.04-14.06)<br><0.01           |
| Household income < \$20K                                          | 3.81 (2.06-7.05)<br><0.01                                     | 3.61 (1.91-6.81)<br><0.01  | 3.62 (1.95-6.75)<br><0.01        | 3.61 (1.96-6.68)<br><0.01            |
| Parental Asthma                                                   | €                                                             | 1.87 (1.08-3.23)<br>0.026  | 2.03 (1.19-3.47)<br><0.01        | 2.12 (1.26-3.56)<br><0.01            |
| Sensitization to Egg at 1 year                                    | 2.92 (1.48-5.74)<br><0.01                                     | 2.92 (1.45-5.90)<br><0.01  | 2.61 (1.32-5.16)<br>0.006        | 2.84 (1.46-5.54)<br><0.01            |
| Eczema                                                            | €                                                             | 2.06 (1.14-3.74)<br>0.017  | 2.02 (1.12-3.64)<br>0.02         | 2.35 (1.34-4.14)<br><0.01            |
| Daycare attendance                                                | 1.57 (1.0-2.69)<br>0.1                                        | 1.59 (0.91-2.78)<br>0.103  | 1.81 (1.05-3.11)<br>0.03         | 1.73 (1.01-2.95)<br>0.04             |
| Dog ownership                                                     | 0.58 (0.32-0.99)<br>0.06                                      | *                          | *                                | *                                    |
| ECAT exposure $\geq 75^{\text{th}}$ percentile from birth-3 years | *                                                             | *                          | *                                | *                                    |

20 ucAPI: University of Cincinnati API

21 # ucAPI defined using  $\geq 4$  episodes of wheezing in the prior 12 months (instead of  $\geq 2$  wheezing episodes)

22 aOR = adjusted odds ratio

23 ^ Significant at  $p \leq 0.10$

24 - Not included in the model

25 € Not included in the model because it was one of the defining criteria for a positive ucAPI

26 \* Not significant at  $p \leq 0.10$

27 The initial multivariate models included all covariates (except when denoted by - or €), including gender, race, exposure to environmental tobacco smoke, breast feeding, sensitization to aeroallergens, egg and milk at 1 and 3 years of age, cat ownership, and ECAT exposure  $\geq 75^{\text{th}}$  percentile between birth to 3 years of age but were not significant an alpha of 10%.

32

33 **Table E4. Adjusted Odds Ratios for Associations of a Positive ucAPI (defined using  $\geq 2$  wheezing**  
 34 **episodes per year), Persistent Wheezing, Atopic Persistent Wheezing and Non-atopic Persistent**  
 35 **Wheezing at Age 3 With Asthma Outcome at Age 7 ( $n=95$ )<sup>#</sup> in Separate Logistic Regression Models.**

| Exposure/Covariate                                                | aOR (95% CI) for Asthma at 7 years ( $n=95$ ) <sup>#</sup><br>[p-value <sup>^</sup> ] |                           |                                  |                                      |
|-------------------------------------------------------------------|---------------------------------------------------------------------------------------|---------------------------|----------------------------------|--------------------------------------|
|                                                                   | ucAPI Model                                                                           | Persistent Wheezing Model | Atopic Persistent Wheezing Model | Non-atopic Persistent Wheezing Model |
| Positive ucAPI at 3 years                                         | 11.63 (6.6-22.33)<br><0.01                                                            | -                         | -                                | -                                    |
| Persistent Wheezing at 3 years                                    | -                                                                                     | 8.52 (4.2-17.3)<br><0.01  | -                                | -                                    |
| Atopic Persistent Wheezing at 3 years                             | -                                                                                     | -                         | 9.7 (3.77-24.94)<br><0.01        | -                                    |
| Non-atopic Persistent Wheezing at 3 years                         | -                                                                                     | -                         | -                                | 4.72 (1.8-12.72)<br><0.01            |
| Household income < \$20K                                          | 3.27 (1.71-6.25)<br><0.01                                                             | 3.36 (1.75-6.67)<br><0.01 | 3.31 (1.74-6.31)<br><0.01        | 3.45 (1.83-6.50)<br><0.01            |
| Parental Asthma                                                   | €                                                                                     | 1.96 (1.12-3.45)<br>0.02  | 2.19 (1.26-3.80)<br><0.01        | 2.27 (1.32-3.88)<br><0.01            |
| Sensitization to Egg at 1 year                                    | 2.63 (1.3-5.32)<br><0.01                                                              | 2.61 (1.26-5.41)<br>0.01  | 2.36 (1.16-4.79)<br>0.02         | 2.48 (1.24-4.98)<br>0.01             |
| Eczema                                                            | €                                                                                     | 2.11 (1.15-3.88)<br>0.02  | 1.98 (1.10-3.64)<br>0.02         | 2.35 (1.31-4.21)<br><0.01            |
| Daycare attendance                                                | 1.99 (1.12-3.52)<br>0.042                                                             | 1.83 (1.02-3.26)<br>0.103 | 2.05 (1.16-3.60)<br>0.03         | 1.95 (1.12-3.40)<br>0.02             |
| Dog ownership                                                     | 0.6 (0.33-0.99)<br>0.08                                                               | *                         | *                                | *                                    |
| ECAT exposure $\geq 75^{\text{th}}$ percentile from birth-3 years | *                                                                                     | *                         | *                                | *                                    |

36 #N=95 children with asthma after removal of 8 children who were included based on daily use of an  
 37 asthma controller medication.

38 ucAPI: University of Cincinnati API

39 aOR = adjusted odds ratio

40 ^ Significant at  $p \leq 0.10$

41 - Not included in the model

42 € Not included in the model because it was one of the defining criteria for a positive ucAPI

43 \* Not significant at  $p \leq 0.10$

44 The initial multivariate models included all covariates (except when denoted by - or €), including gender,  
 45 race, exposure to environmental tobacco smoke, breast feeding, sensitization to aeroallergens, egg and  
 46 milk at 1 and 3 years of age, cat ownership, and ECAT exposure  $\geq 75^{\text{th}}$  percentile between birth to 3 years  
 47 of age but were not significant an alpha of 10%.
